# Supplementary material
Source: PubMed Central journal article supplement (PMC2439457)
Supplement: JCI0834672sd.pdf [file JCI0834672sd.pdf]

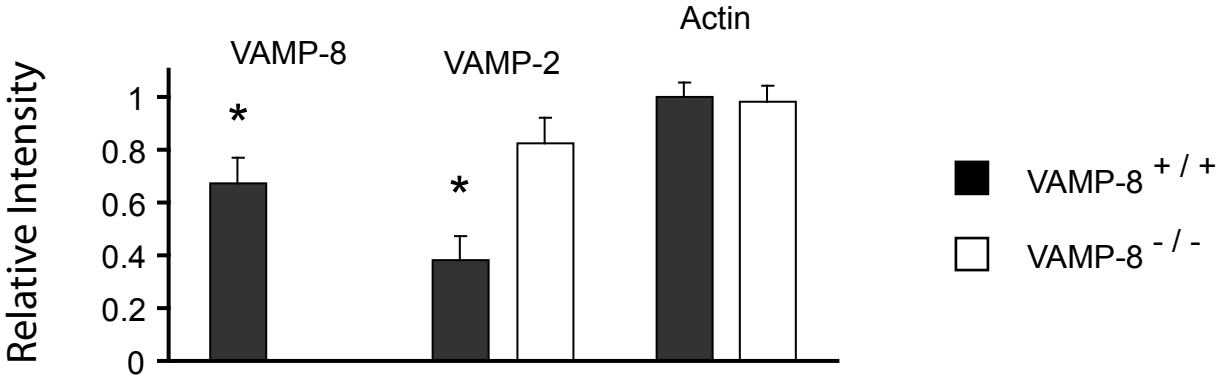

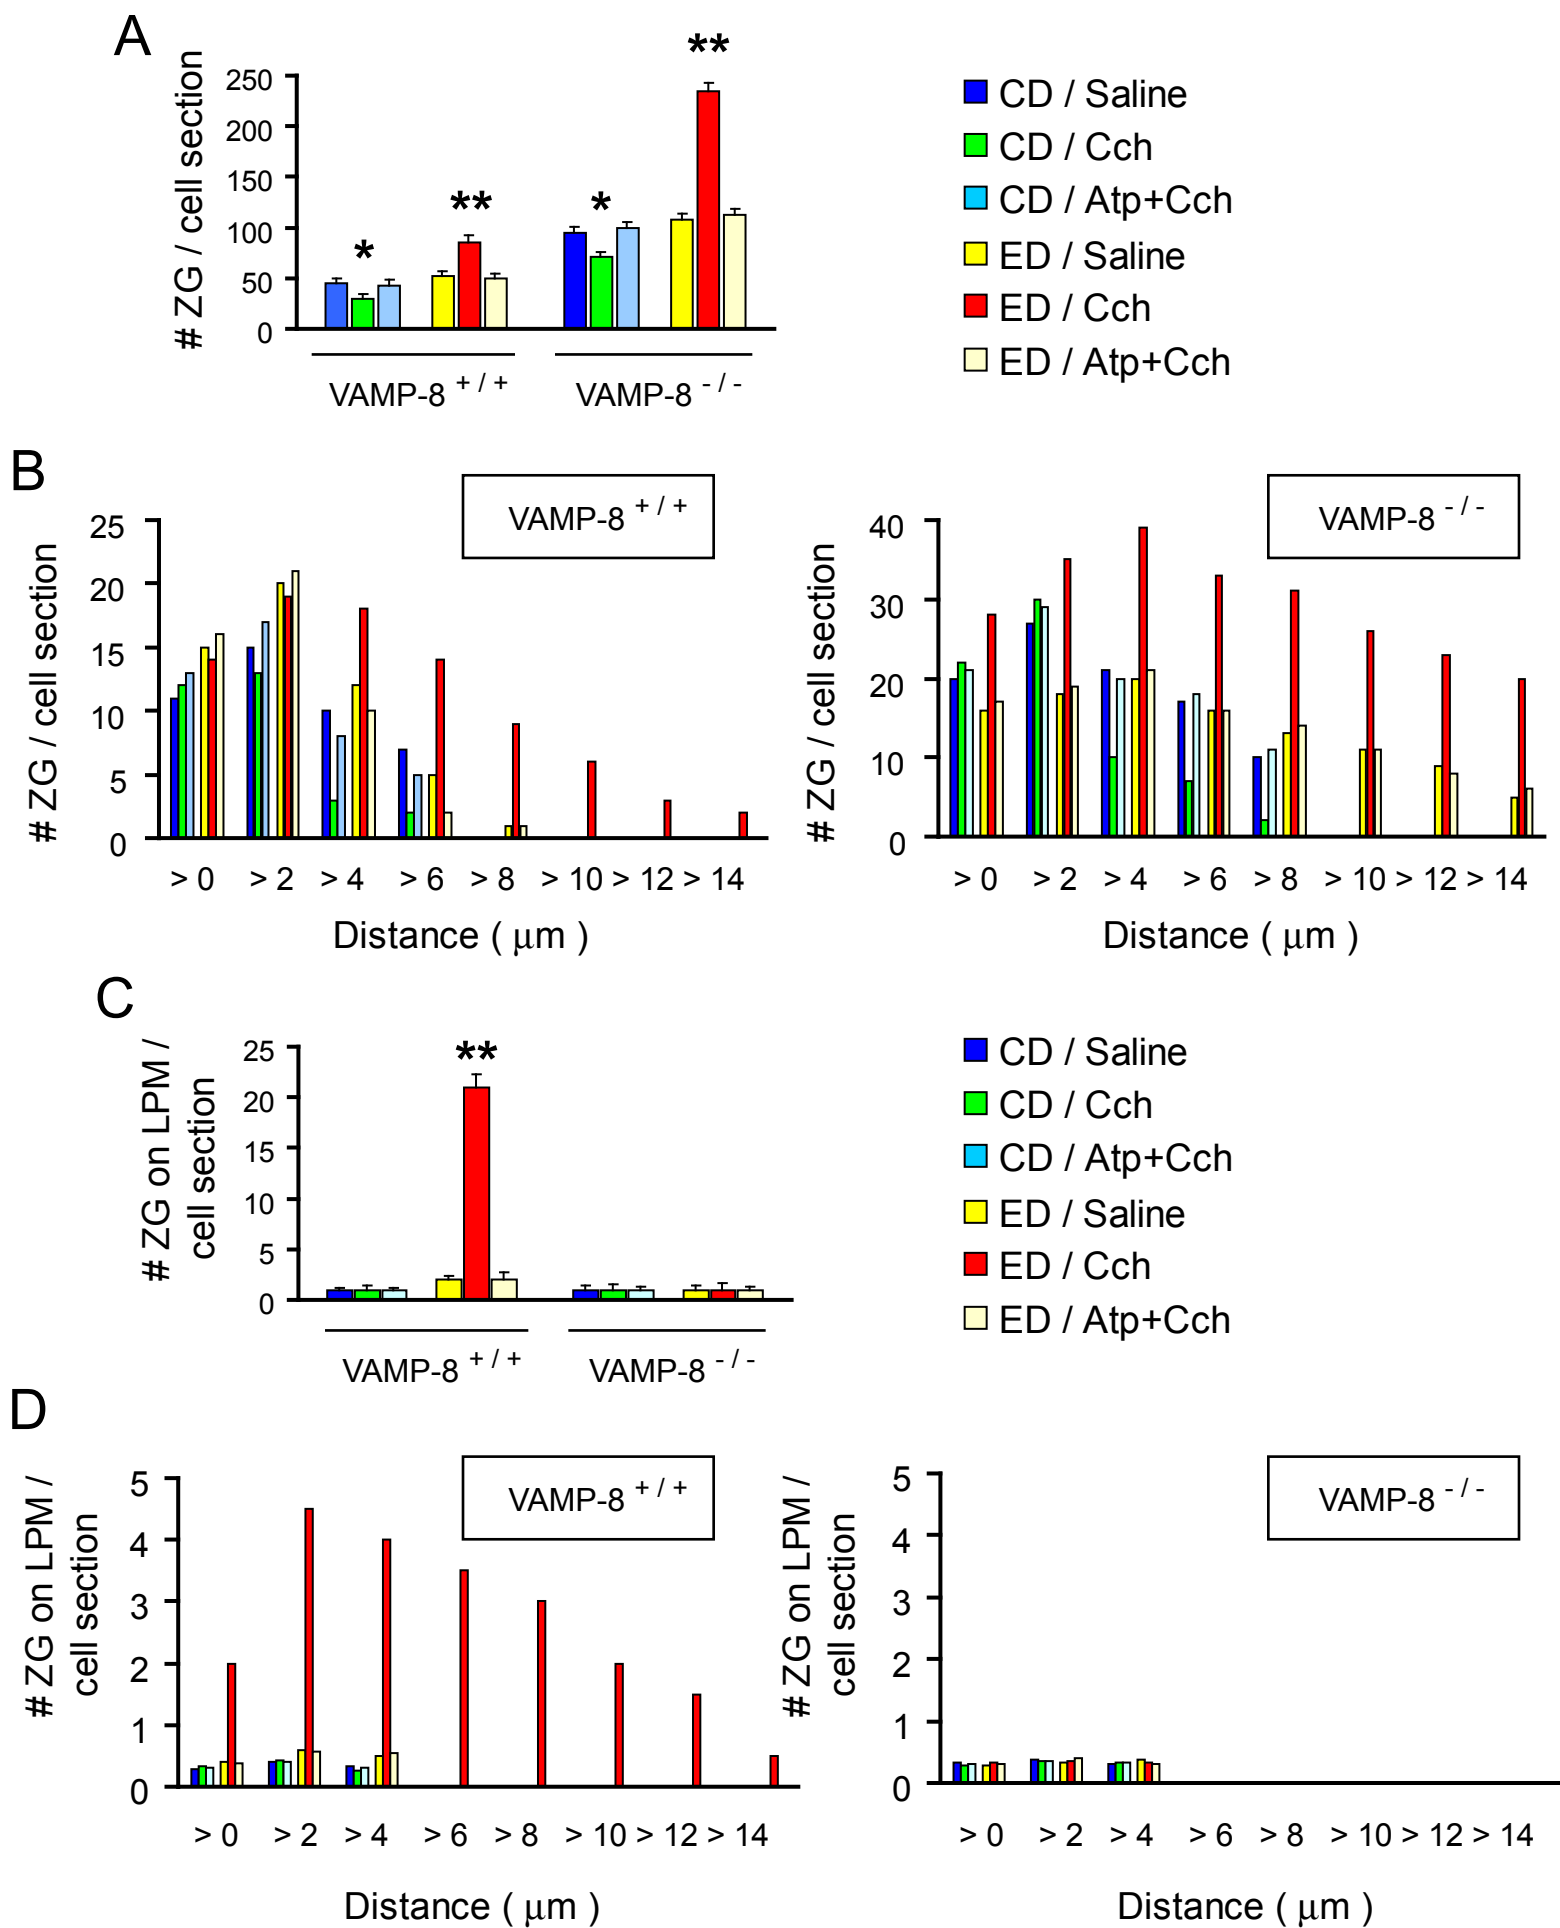

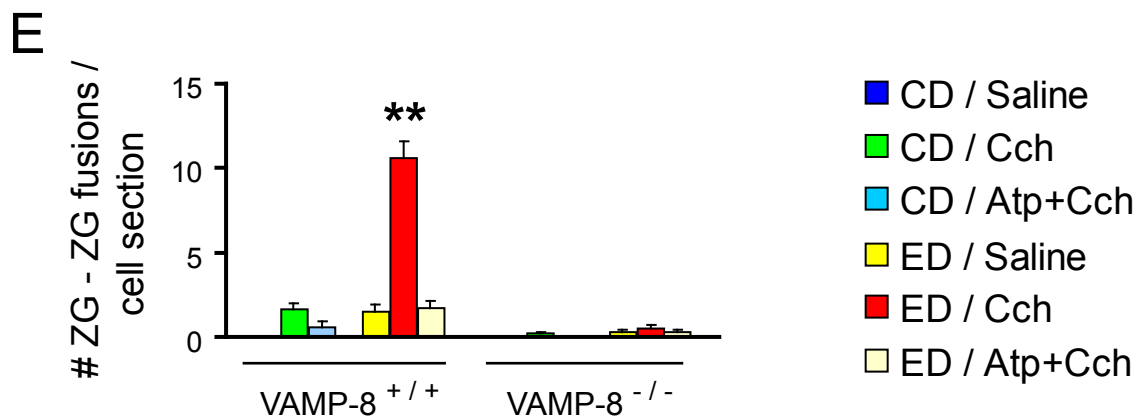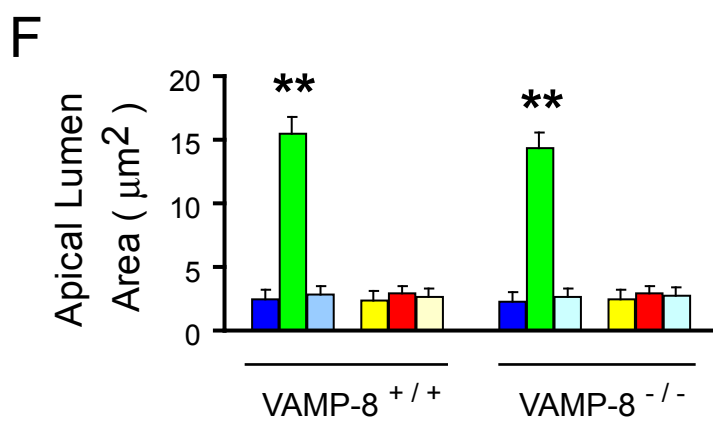

**A**

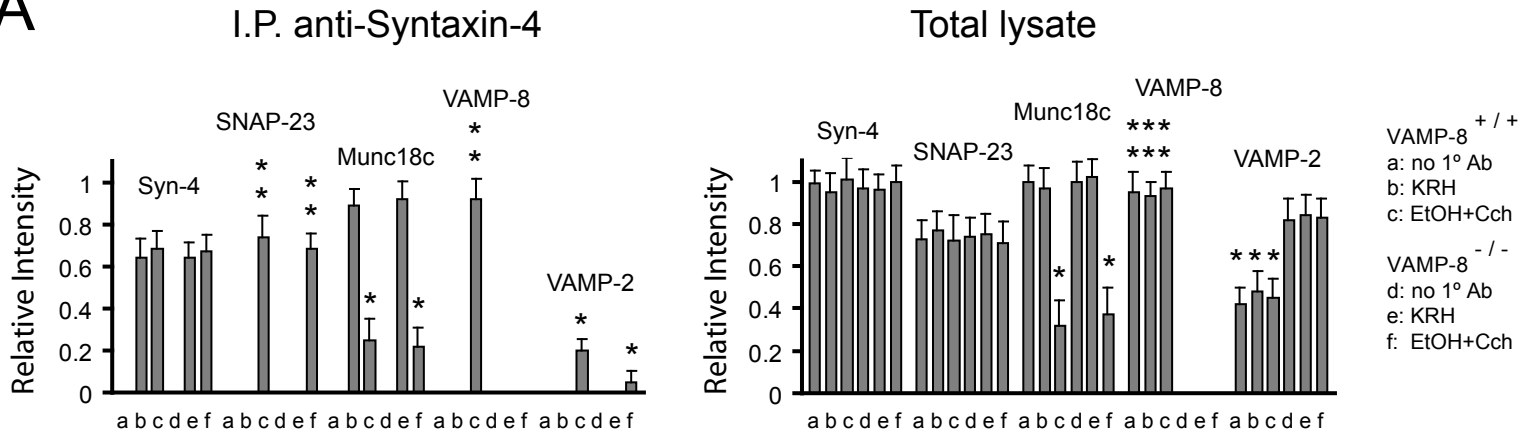

**B**

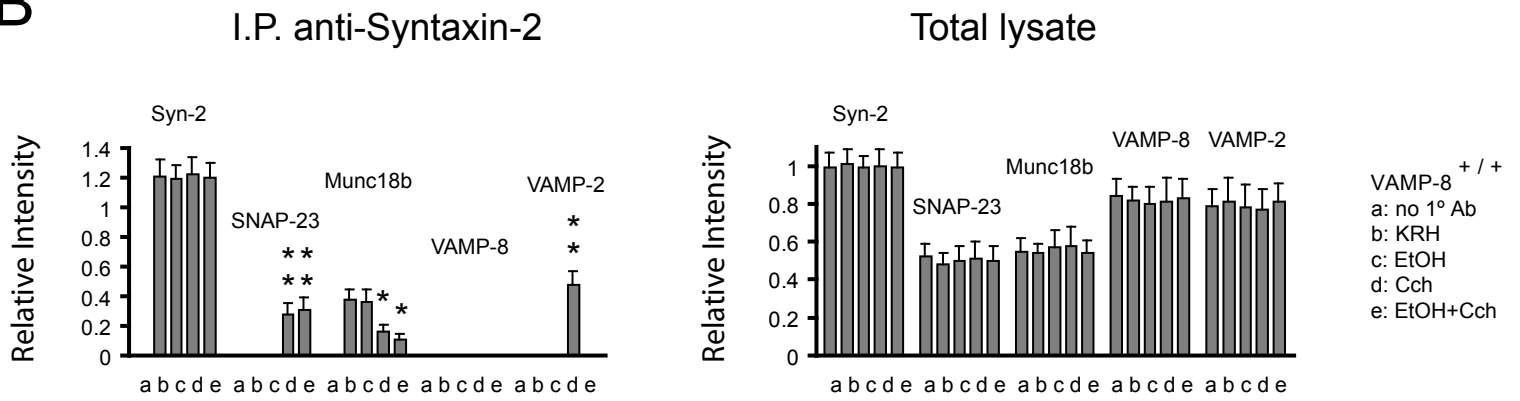

**C**

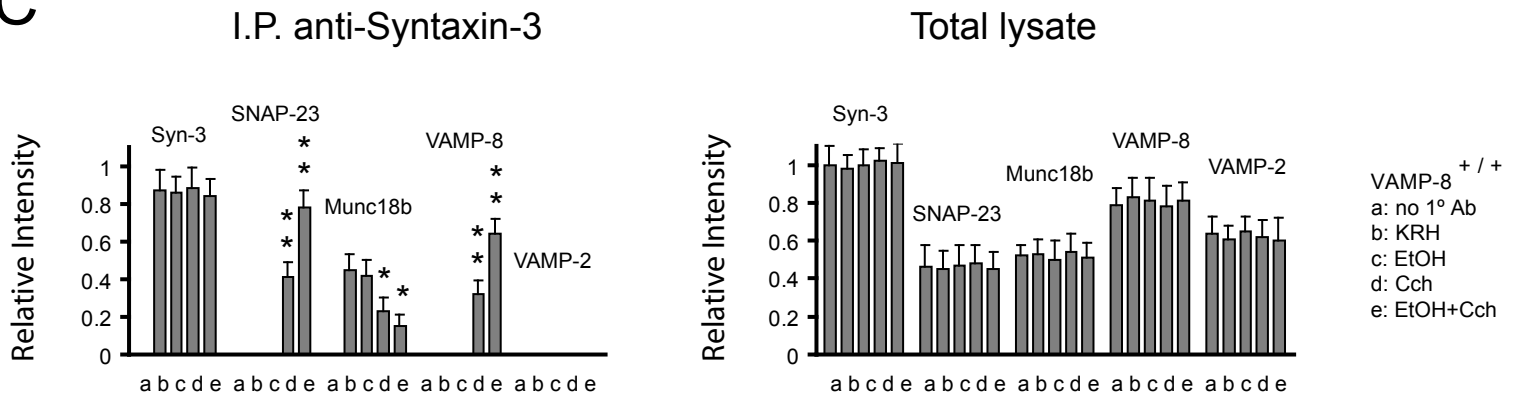

Supplemental Table 1. Pancreatic tissue parameters in supramaximal cerulein-induced pancreatitis

|                       | Group    | MPO<br>UMPO/mg<br>DNA | Active<br>Trypsin<br>nmoles/mg<br>DNA | NF-kB<br>(p65)<br>ug/mg<br>DNA | NF-kB<br>(p50)<br>ug/mg<br>DNA | LPO<br>nmol/mg<br>DNA       | MDA<br>umol/mg<br>DNA |
|-----------------------|----------|-----------------------|---------------------------------------|--------------------------------|--------------------------------|-----------------------------|-----------------------|
| VAMP-8 <sup>+/+</sup> | Control  | 0±0                   | 0.16±0.07                             | below<br>detection<br>limit    | below<br>detection<br>limit    | below<br>detection<br>limit | 0.79±0.10             |
|                       | Cerulein | 21.05±0.84            | 5.48±0.29                             | 439±25                         | 6.13±0.10                      | 357±33                      | 25.21±0.23            |
| VAMP-8 <sup>-/-</sup> | Control  | 0±0                   | 0.11±0.04                             | below<br>detection<br>limit    | below<br>detection<br>limit    | below<br>detection<br>limit | 0.75±0.08             |
|                       | Cerulein | 7.32±0.94<br>*        | 4.17±0.16                             | 176±18<br>*                    | 2.85±0.14<br>*                 | 130±16<br>*                 | 16.03±0.15<br>*       |

\* p&lt;0.05

Supplemental Table 2. Serum parameters in supramaximal cerulein-induced pancreatitis

|                       | Group    | Amylase (IU/L)     | Lipase (IU/L)      | IL-6 (pg/mL)          | TNF $\alpha$ (pg/mL)  | MIP-1 $\alpha$ (pg/mL) |
|-----------------------|----------|--------------------|--------------------|-----------------------|-----------------------|------------------------|
| VAMP-8 <sup>+/+</sup> | Control  | 583 $\pm$ 11       | 21 $\pm$ 3         | below detection limit | below detection limit | 7 $\pm$ 2              |
|                       | Cerulein | 5689 $\pm$ 48      | 4115 $\pm$ 29      | 1144 $\pm$ 39         | 523 $\pm$ 32          | 991 $\pm$ 42           |
| VAMP-8 <sup>-/-</sup> | Control  | 525 $\pm$ 19       | 16 $\pm$ 2         | below detection limit | below detection limit | 5 $\pm$ 0.7            |
|                       | Cerulein | 2864 $\pm$ 33<br>* | 1806 $\pm$ 28<br>* | 699 $\pm$ 12<br>*     | 273 $\pm$ 39<br>*     | 611 $\pm$ 21<br>*      |

\* p&lt;0.05

Supplemental Table 3. Histopathological score in supramaximal cerulein-induced pancreatitis

|                       | Group    | Edema          | Hemorrhage     | Infiltrate     | Necrosis       |
|-----------------------|----------|----------------|----------------|----------------|----------------|
| VAMP-8 <sup>+/+</sup> | Control  | 0±0            | 0±0            | 0±0            | 0±0            |
|                       | Cerulein | 1.17±0.09      | 3.11±0.15      | 2.51±0.12      | 3.31±0.2       |
| VAMP-8 <sup>-/-</sup> | Control  | 0±0            | 0±0            | 0±0            | 0±0            |
|                       | Cerulein | 0.97±0.05<br>* | 1.54±0.16<br>* | 1.17±0.09<br>* | 1.32±0.14<br>* |

\* p<0.05

Supplemental Table 4. Lung tissue parameters and histopathological score in supramaximal cerulein-induced pancreatitis

|                       | Group    | Edema        | Hemorrhage   | Leukocyte Infiltrate | MPO UMPO/mg DNA | NF-kB (p65) ug/mg DNA | NF-kB (p55) ug/mg DNA |
|-----------------------|----------|--------------|--------------|----------------------|-----------------|-----------------------|-----------------------|
| VAMP-8 <sup>+/+</sup> | Control  | 0±0          | 0±0          | 0±0                  | 0±0             | below detection limit | below detection limit |
|                       | Cerulein | 2.2±0.3      | 3.7±0.6      | 2.1±0.8              | 13.0±0.4        | 315±46                | 3.3±0.50              |
| VAMP-8 <sup>-/-</sup> | Control  | 0±0          | 0±0          | 0±0                  | 0±0             | below detection limit | below detection limit |
|                       | Cerulein | 0.8±0.1<br>* | 1.6±0.5<br>* | 1.1±0.3<br>*         | 5.6±1.0<br>*    | 108±12<br>*           | 1.5±0.14<br>*         |

\* p<0.05



## Supplementary Data

**Supplemental Figure 1:** Summary of the NIH-Image densitometry analysis of the data from **Figure 3A** showing VAMP-8, VAMP-2 and actin levels in pancreatic acini of VAMP-8<sup>+/+</sup> and VAMP-8<sup>-/-</sup> mice. The data was from three independent experiments, with samples performed in duplicates. \*:  $p < 0.05$ .

**Supplemental Figure 2: Morphometric analysis of EM of pancreatic tissues of CD- and ED-fed VAMP-8<sup>+/+</sup> and VAMP-8<sup>-/-</sup> mice: ZG abundance, distribution, fusion events, and apical lumen area.** The data shown is the analysis of the EM images shown in **Figs. 6 and 7**.

**A)** Number of ZGs per EM cell section. **B)** Distribution of ZGs within the acinar cell section. X axis indicates the distance from the apical lumen. **C)** Number of ZGs per cell section docked on the lateral PM (LPM). **D)** Distribution of ZGs per cell section docked on the LPM. X axis indicates the distance from the junctional complex. **E)** Number of ZG-ZG fusions per EM cell section. **F)** Apical lumen areas. For each strain and treatment, 300 cells from 3 independent experiments were quantified. Data are expressed as means  $\pm$  SD; statistical significance was examined by Mann-Whitney U-test (non-parametric) for ZGs analysis and Student *t* test for apical lumen areas. \*:  $p < 0.05$  and \*\*:  $p < 0.01$  compared to CD/Saline.

**Supplemental Figure 3:** Summary of the NIH-Image densitometry analysis of the data from **Figure 9**, which are immunoprecipitated Syntaxin-4 (in **A**) and Syntaxin-2 (in **B**) from PM fractions, and immunoprecipitated Syntaxin-3 from ZG membrane fractions (in **C**) prepared from pancreatic acini stimulated by the indicated treatment conditions. VAMP-8<sup>+/+</sup> and VAMP-8<sup>-/-</sup>

mice acini were used in **A**, whereas only VAMP-8<sup>+/+</sup> mice acini were used in **B** and **C**. The data came from blots of three independent experiments, with samples performed in duplicates. Data is expressed as means  $\pm$  SD; \*:  $p < 0.05$  compared to KRH.

**Supplemental Table 1: Pancreatic tissue parameters in supramaximal cerulein-induced pancreatitis.**

\*:  $p < 0.05$  compared to VAMP-8<sup>+/+</sup> mice.

**Supplemental Table 2: Serum parameters in supramaximal cerulein-induced pancreatitis.**

\*:  $p < 0.05$  compared to VAMP-8<sup>+/+</sup> mice.

**Supplemental Table 3: Histopathological score in supramaximal cerulein-induced pancreatitis.**

\*:  $p < 0.05$  compared to VAMP-8<sup>+/+</sup> mice.

**Supplemental Table 4: Lung tissue parameters and histopathological score in supramaximal cerulein-induced pancreatitis.**

\*:  $p < 0.05$  compared to VAMP-8<sup>+/+</sup> mice.
